# Zebrafish second heart field development relies on progenitor specification in anterior lateral plate mesoderm and *nkx2.5* function

Burcu Guner-Ataman<sup>1,2</sup>, Noelle Paffett-Lugassy<sup>1,2,3</sup>, Meghan S. Adams<sup>1,2</sup>, Kathleen R. Nevis<sup>1,2</sup>, Leila Jahangiri<sup>1,2</sup>, Pablo Obregon<sup>1,2</sup>, Kazu Kikuchi<sup>4</sup>, Kenneth D. Poss<sup>4</sup>, Caroline E. Burns<sup>1,2,3,\*</sup> and C. Geoffrey Burns<sup>1,2,\*</sup>

## SUMMARY

Second heart field (SHF) progenitors perform essential functions during mammalian cardiogenesis. We recently identified a population of cardiac progenitor cells (CPCs) in zebrafish expressing latent TGF $\beta$ -binding protein 3 (*Itbp3*) that exhibits several defining characteristics of the anterior SHF in mammals. However, *Itbp3* transcripts are conspicuously absent in anterior lateral plate mesoderm (ALPM), where SHF progenitors are specified in higher vertebrates. Instead, *Itbp3* expression initiates at the arterial pole of the developing heart tube. Because the mechanisms of cardiac development are conserved evolutionarily, we hypothesized that zebrafish SHF specification also occurs in the ALPM. To test this hypothesis, we Cre/loxP lineage traced *gata4*<sup>+</sup> and *nkx2.5*<sup>+</sup> ALPM populations predicted to contain SHF progenitors, based on evolutionary conservation of ALPM patterning. Traced cells were identified in SHF-derived distal ventricular myocardium and in three lineages in the outflow tract (OFT). We confirmed the extent of contributions made by ALPM *nkx2.5*<sup>+</sup> cells using Kaede photoconversion. Taken together, these data demonstrate that, as in higher vertebrates, zebrafish SHF progenitors are specified within the ALPM and express *nkx2.5*. Furthermore, we tested the hypothesis that Nkx2.5 plays a conserved and essential role during zebrafish SHF development. Embryos injected with an *nkx2.5* morpholino exhibited SHF phenotypes caused by compromised progenitor cell proliferation. Co-injecting low doses of *nkx2.5* and *Itbp3* morpholinos revealed a genetic interaction between these factors. Taken together, our data highlight two conserved features of zebrafish SHF development, reveal a novel genetic relationship between *nkx2.5* and *Itbp3*, and underscore the utility of this model organism for deciphering SHF biology.

**KEY WORDS:** Gata4, Heart development, Lineage tracing, Nkx2.5, Second heart field, Zebrafish

## INTRODUCTION

Congenital heart defects arise when genetic and/or environmental perturbations undermine normal cardiac development (reviewed by Bruneau, 2008; Epstein, 2010; Mahler and Butcher, 2011; Srivastava and Olson, 2000). As a class, they cause significant mortality during all stages of human life (Roger et al., 2012). The myocardium of the four-chambered vertebrate heart derives from two populations of cardiac progenitor cells (CPCs), termed the first and second heart fields (FHF and SHF) (reviewed by Dyer and Kirby, 2009; Kelly, 2012; Vincent and Buckingham, 2010). The FHF and SHF are co-specified bilaterally in anterior lateral plate mesoderm (ALPM) as naïve mesodermal cells initiate expression of several cardiac transcription factors, including *nkx2.5* (Prall et al., 2007). The FHF differentiates within the ALPM, migrates to the midline and forms the myocardial layer of the linear heart tube, the embryonic precursor to the mammalian left ventricle. By contrast, the medially positioned SHF remains undifferentiated in the ALPM and relocates to midline pharyngeal mesoderm in a region between and including the poles of the nascent heart tube. At this stage, SHF

progenitors proliferate, but also differentiate and accrete new myocardium to the poles of the heart tube to support its elongation. Through this process, the majority of primitive atrial and right ventricular myocardium are accreted to the venous and arterial poles, respectively. After accreting the primitive right ventricle, the SHF (or secondary heart field in avians) contributes differentiated lineages to the OFT, including proximal myocardium and distal smooth muscle (Grimes et al., 2010). All in all, SHF progenitors are multipotent, late-differentiating progenitor cells responsible for building the atria, right ventricle and embryonic OFT of the four-chambered vertebrate heart.

Severe defects in SHF development cause embryonic lethality owing to compromised production of the atria, right ventricle and embryonic OFT (Cai et al., 2003; Ilagan et al., 2006; Prall et al., 2007; von Both et al., 2004). Although intermediate SHF defects are compatible with birth, they can disrupt proper elongation, rotation and alignment of the OFT, leading to anomalous connections between the ventricles and great arteries after OFT septation (Bajolle et al., 2006; Ward et al., 2005).

The homeobox protein Nkx2.5 controls several aspects of cardiac developmental biology, and *NKX2.5* mutations are associated with human congenital heart disease (Benson et al., 1999; Elliott et al., 2003; McElhinney et al., 2003; Schott et al., 1998). In mouse embryos, Nkx2.5 is expressed in both FHF and SHF cells within the ALPM (Stanley et al., 2002). *Nkx2.5*-null mice exhibit mid-gestation embryonic lethality owing to compromised SHF proliferation and accretion of RV and OFT segments to the heart tube (Prall et al., 2007).

<sup>1</sup>Cardiovascular Research Center, Massachusetts General Hospital, Charlestown, MA 02129, USA. <sup>2</sup>Harvard Medical School, Boston, MA 02115, USA. <sup>3</sup>Harvard Stem Cell Institute, Cambridge, MA 02138, USA. <sup>4</sup>Department of Cell Biology and Howard Hughes Medical Institute, Duke University, Durham, NC 27710, USA.

\*Authors for correspondence (cburns6@partners.org; gburns@cvrc.mgh.harvard.edu)

Although initially described in higher vertebrates, a SHF was recently reported to make significant cellular contributions to the two-chambered zebrafish heart. The existence of a zebrafish SHF was inferred originally from cardiomyocyte proliferation, developmental timing and photoconversion assays (de Pater et al., 2009). In 2011, three reports described the zebrafish SHF as a population of CPCs contiguous with the arterial pole of the linear heart tube (Hami et al., 2011; Lazic and Scott, 2011; Zhou et al., 2011). The zebrafish SHF expresses homologs of CPC markers from higher vertebrates (*nkx2.5*, *mef2c* and *isll*) but not the terminal differentiation marker *cmlc2* (Hami et al., 2011; Hinits et al., 2012; Lazic and Scott, 2011; Witzel et al., 2012; Zhou et al., 2011). We discovered that transcripts encoding latent TGF $\beta$  binding protein 3 (*ltbp3*) mark the zebrafish SHF, and we used Cre/loxP lineage tracing of *ltbp3*<sup>+</sup> cells to delineate the cardiac descendants of the zebrafish SHF (Zhou et al., 2011). *ltbp3*<sup>+</sup> cells traced to the distal half (relative to blood flow) of the ventricular myocardium and to three lineages in the OFT, including myocardium, endocardium and Eln2<sup>+</sup> smooth muscle precursors. As predicted, perturbations to the zebrafish SHF manifest as developmental failures of SHF-derived structures, the most obvious being reductions in distal ventricular cardiomyocytes and OFT smooth muscle (de Pater et al., 2009; Hami et al., 2011; Lazic and Scott, 2011; Zhou et al., 2011).

A fate map of the zebrafish ALPM revealed that myocardial progenitors reside in its posterior region (*gata4*<sup>+</sup>, *hand2*<sup>+</sup>) with atrial and ventricular progenitors inhabiting the lateral (*nkx2.5*<sup>-</sup>) and medial segments (*nkx2.5*<sup>+</sup>), respectively (Schoenebeck et al., 2007). In this way, mediolateral patterning of the ALPM heart-forming region is conserved with higher vertebrates (Abu-Issa and Kirby, 2007). We hypothesized that the cellular composition of the zebrafish ALPM would also be conserved and include medially specified SHF progenitors distinguished by unique genetic markers (Cai et al., 2003; Kelly et al., 2001). However, the specific SHF marker *ltbp3* is absent in the ALPM, instead becoming detectable at the arterial pole of the forming heart tube after midline migration of the heart field (Zhou et al., 2011). These apparent species-specific differences in the spatiotemporal expression patterns of SHF-restricted markers suggest that: (1) *ltbp3* expression does not coincide with SHF specification in the zebrafish ALPM; or (2) SHF specification in zebrafish occurs at a later developmental stage in pharyngeal mesoderm.

Initial evidence to favor the former explanation was provided by a recent dye-tracing study demonstrating that at least some SHF myocardial and smooth muscle progenitors reside in the zebrafish ALPM (Hami et al., 2011). Here, we extend the dye tracing experiments of Hami et al. by performing genetic lineage-tracing studies of the zebrafish ALPM. Through these analyses, we characterized the full spectrum of cardiac derivatives and the molecular identity of SHF progenitors specified within the ALPM. Specifically, using an inducible Cre/loxP strategy, we discovered that *gata4*<sup>+</sup> and *nkx2.5*<sup>+</sup> ALPM progenitors give rise to SHF-derived distal ventricular myocardium and OFT lineages. As a complementary approach, we performed Kaede fate mapping of *nkx2.5*<sup>+</sup> cells within the ALPM and learned that the large majority of, and probably all, SHF progenitors for the ventricle and OFT are specified within the posterior and medial *nkx2.5*<sup>+</sup> region of the *gata4*<sup>+</sup> ALPM. Furthermore, we tested the hypothesis that *nkx2.5* plays an evolutionarily conserved role during SHF development in zebrafish. Specifically, we discovered that embryos injected with an antisense *nkx2.5* morpholino exhibit SHF phenotypes attributable to defective proliferation of SHF progenitors. Last, we uncovered a novel genetic interaction between *nkx2.5* and *ltbp3* during SHF-mediated OFT development.

## MATERIALS AND METHODS

### Zebrafish husbandry and strains

Zebrafish were maintained as described previously (Westerfield, 2000). Animal protocols were approved by the Massachusetts General Hospital Institutional Animal Care and Use Committee. The following zebrafish strains were used: wild-type AB; wild-type TuAB; *Tg(-14.8gata4:ERCreER)<sup>pd39</sup>* (Kikuchi et al., 2010); *TgBAC(-25ltbp3:TagRFP2Acree)<sup>fb1</sup>* (Zhou et al., 2011); *Tg(cmlc2:CSY)<sup>fb2</sup>* (Zhou et al., 2011); *TgBAC(eln2:CSY)<sup>fb4</sup>* (Zhou et al., 2011); *TgBAC(kdrl:CSY)<sup>fb3</sup>* (Zhou et al., 2011); *Tg(cmlc2:dsRed2-nuc)<sup>fb2</sup>* (Mably et al., 2003); *[Tg(-3.5ubi:loxP-EGFP-loxP-mCherry)III]<sup>cz1701</sup>* (Mosimann et al., 2011); *Tg(-36nkx2.5:ZsYellow)<sup>fb7</sup>* (Zhou et al., 2011); *Tg(tbp:GAL4; cmlc2:cerulean)<sup>fb13</sup>* (van Ham et al., 2010) and *Tg(UAS:secA5-YFP; cmlc2:mcherry)<sup>fb12</sup>* (van Ham et al., 2010). To generate the *TgBAC(-36nkx2.5:ERCreER)<sup>fb8</sup>* driver and *TgBAC(-36nkx2.5:Kaede)<sup>fb9</sup>* photoconvertible strains, BAC DKEY-9115 was modified and trimmed as described (Zhou et al., 2011), except with protein-coding sequences for ERCreER (Matsuda and Cepko, 2007) and Kaede (Ando et al., 2002), respectively. Germline transmission of BAC transgenes was achieved through co-injection of Tol2 transposase (Suster et al., 2009).

### Genetic lineage tracing

Zebrafish hemizygous for a single driver transgene or single reporter transgene were incrossed and their embryos arrayed 30 per well in 12-well plates. For all treatments, embryos were incubated in 1 ml embryo medium (E3) containing 4-hydroxytamoxifen (4-OHT) (Sigma-Aldrich, St Louis, MO) at a final concentration of 10  $\mu$ M. For mock treatments, embryos were incubated in 1 ml E3 containing an equivalent volume of 100% ethanol, the solvent for the 10 mM (1000 $\times$ ) 4-OHT stock. For continuous 4-OHT exposures, treatments were initiated at 75% epiboly (8 hpf) and at two subsequent time points (24 and 48 hpf), embryos were washed 10 times with 50 ml E3 and returned to the wells with fresh dilutions of 4-OHT. For pulsed 4-OHT exposure, treatments were initiated at 75% epiboly (8 hpf). At the 14- to 16-somite stage, embryos were washed 10 times with 50 ml E3 and returned to the wells with E3 alone. Embryos were fixed at 72 hpf (for myocardial and ubiquitous lineage tracing) or at 6 dpf (for OFT endothelial and smooth muscle cell lineage tracing) in 4% paraformaldehyde for at least 1 hour, rinsed in 1 $\times$ PBS plus 1% Tween for 30 minutes, and transferred to 1 $\times$ PBS prior to analysis and imaging. Embryos carrying the lineage-specific reporter transgene were identified visually by cardiac AmCyan and/or ZsYellow expression. Embryos carrying the ubiquitous reporter transgene were identified by whole embryo GFP expression. The numbers of double transgenic embryos in each clutch were calculated based on Mendelian inheritance of the driver transgene.

### Microscopy and imaging

Microscopy and imaging were performed as described (Zhou et al., 2011). Prior to imaging, embryos were embedded in 1.2% low melting point agarose (NuSieve GTG Agarose, Lonza) in 35 mm MatTek glass bottom Petri dishes (MatTek Corporation, Ashland, MA). Embedded embryos were immersed in 1 $\times$ PBS prior to confocal imaging with a 40 $\times$  water immersion objective. Z-stack confocal images were analyzed with ImageJ software (Abramoff et al., 2004). Cardiomyocyte nuclei in the atrium and ventricle were distinguished by the atrio-ventricular junction.

### In situ hybridization and immunohistochemistry

*In situ* hybridization was performed with antisense *ltbp3* and *cmlc2* riboprobes as described previously (Zhou et al., 2011). Embryos were double stained with MF20 and  $\alpha$ -Eln2 antibodies as described previously (Zhou et al., 2011).

### Kaede photoconversion

*Tg(nkx2.5:Kaede)* embryos were photoconverted using a Nikon Eclipse 80i fluorescent microscope (Nikon Inc., Melville, NY), 20 $\times$  objective, UV filter (Nikon UV-2E/C) and Lumen 200 Fluorescence Lumination System (Prior Scientific, Rockland, MA). At 14- to 16-somite stages, embryos were mounted in 0.9% low melting point agarose in 35 mm MatTek glass bottom Petri dishes (MatTek Corporation, Ashland, MA). Prior to photoconversion, embryos were imaged using a GFP filter. Immediately thereafter, embryos were exposed continually to UV light for 60 seconds and assessed visually for

residual green fluorescence. As needed, embryos were exposed to UV light for an additional 20 seconds, generally sufficient for complete photoconversion. Photoconverted embryos were arrayed individually in six-well plates and incubated in the dark until 72 hpf, when they were imaged live by confocal microscopy. During imaging, embryos were anesthetized with Tricaine (Sigma-Aldrich, St Louis, MO) and treated with 2,3-butanedione 2-monoxime (Sigma-Aldrich, St Louis, MO) to cease cardiac contractions.

#### Morpholino injections and mRNA rescue

One-cell stage embryos were injected with 2.5–3.5 ng of a previously validated antisense morpholino [anti-*nkx2.5* splice MO (Targoff et al., 2008)] that inhibits pre-mRNA splicing of *nkx2.5*. Uninjected embryos were used as controls in all experiments. A full-length *nkx2.5* cDNA was cloned into pCS2+ using In-Fusion cloning (Clontech, Mountain View, CA, USA). mRNA was transcribed with SP6 polymerase after plasmid digestion with *KpnI*. Messenger RNA (200 pg) was injected into the yolks of embryos pre-injected with morpholino. At 72 hpf, embryos in each experimental group were scored based on OFT Eln2 staining. Embryos were categorized as ‘unaffected’ if a prominent Eln2 signal was visible in the OFT. Embryos were scored as ‘absent’ if no Eln2 signal was visible in the OFT. Embryos were scored as ‘reduced’ if a significant reduction in Eln2 staining was observed.

Three different combinations of morpholinos were co-injected into the yolks of one-cell stage embryos to test for a genetic interaction between *ltp3* and *nkx2.5*: (1) 0.6 ng *ltp3* MO [*MO<sup>sp</sup>* (Zhou et al., 2011)] plus 2.5 ng control MO (Vivo-Morpholino standard control oligo, Genetools, Philomath, OR, USA); (2) 0.6 ng control MO plus 2.5 ng *nkx2.5* MO [anti-*nkx2.5* splice MO; (Targoff et al., 2008)]; and (3) 0.6 ng *ltp3* MO plus 2.5 ng *nkx2.5* MO. At 72 hpf, embryos were scored based on OFT Eln2 staining.

#### Quantitative PCR

Quantitative PCR was performed with an Applied Biosystems 7500 Fast Real-Time PCR System (Life Technologies, Carlsbad, CA, USA) using Fast SYBR Green Supermix (Bio-Rad, Hercules, CA) and primers for *ltp3* [Ltp3F (5′-TCTGTGTTCACTCTGCAAGG-3′), Ltp3R (5′-GTTTTGGT-ACTGTGAGGCTTG-3′)] and  $\beta$ -actin [ $\beta$ -ActinF (5′-ATCTTCACTCCCCTTGTTAC-3′) and  $\beta$ -ActinR (5′-TCATCTCCAGCAAAACCGG-3′)]. To exclude notochord expression of *ltp3* from the analysis, anesthetized embryos were severed at the anterior tip of the notochord, and the posterior segments excluded. Three biological replicates were analyzed in triplicate.

#### RT-PCR

Total RNA was extracted from 20 28-hpf control and morphant embryos using Trizol Reagent (Life Technologies, Carlsbad, CA, USA). First-strand cDNA was synthesized using Superscript III according to the manufacturer’s protocol (Life Technologies, Carlsbad, CA). Primers F1, R1 and R2 (Targoff et al., 2008) were used to amplify first-strand cDNAs for unspliced (F1/R1) or spliced (F1/R2) *nkx2.5* transcripts. Amplification of the 18S rRNA (Feng et al., 2010) was used as a loading control.

#### EdU protocol

SHF proliferation in *Tg(nkx2.5:ZsYellow)* embryos was assessed with the Click-iT EdU Imaging Kit (Life Technologies, Carlsbad, CA, USA) as previously described (Mahler et al., 2010) with some modifications. EdU incorporation (red fluorescence) and ZsYellow protein expression (green fluorescence) were detected by double immunostaining. A detailed protocol is available upon request. Double-positive cells in the heart tube were identified as red fluorescent nuclei surrounded by green cellular fluorescence in z-stack confocal slices.

#### Statistics

*P*-values were calculated using an unpaired Student’s *t*-test.

## RESULTS

### Inducible Cre/loxP lineage tracing reveals specification of *gata4*<sup>+</sup> and *nkx2.5*<sup>+</sup> SHF progenitors in the zebrafish ALPM

Based on similarities in ALPM patterning between zebrafish (Schoenebeck et al., 2007) and higher vertebrates (Abu-Issa and

Kirby, 2007), we hypothesized that the posterior and medial *nkx2.5*<sup>+</sup> region of the *gata4*<sup>+</sup> ALPM contains SHF progenitors that will come to express *ltp3* transcripts after relocating to midline pharyngeal mesoderm. We tested this hypothesis by evaluating the respective contributions of *gata4*<sup>+</sup> and *nkx2.5*<sup>+</sup> ALPM progenitors to SHF-derived regions of the ventricle and OFT (Zhou et al., 2011) using inducible Cre/loxP-mediated lineage tracing.

To delineate the myocardial fates of *gata4*<sup>+</sup> and *nkx2.5*<sup>+</sup> ALPM progenitors, we analyzed double transgenic embryos carrying an inducible Cre driver transgene [either *Tg(gata4:ERCreER)* (Kikuchi et al., 2010) or *Tg(nkx2.5:ERCreER)* (Fig. 1A)] and the Cre-responsive myocardial switch reporter *Tg(cmlc2:loxPAmCyanSTOPloxPZsYellow)* [abbreviated *Tg(cmlc2:CSY)* (Fig. 1B) (Zhou et al., 2011)]. The *cis*-regulatory elements contained in the driver transgenes direct expression of heterologous proteins, in this case 4-hydroxy-tamoxifen (4-OHT)-inducible Cre recombinase (ERCreER), to *gata4*<sup>+</sup> (Heicklen-Klein and Evans, 2004; Kikuchi et al., 2010) or *nkx2.5*<sup>+</sup> (supplementary material Fig. S1) cells in the ALPM. The switch reporter expresses the AmCyan fluorescent protein in all myocardial cells. However, if Cre activity is introduced into myocardial progenitor cells, or their descendants, then reporter recombination will occur, and those myocardial cells carrying the recombined transgene will initiate expression of the ZsYellow reporter protein (Zhou et al., 2011).

To confirm that reporter recombination is dependent on 4-OHT-mediated Cre induction, we mock treated *Tg(gata4:ERCreER)*; *Tg(cmlc2:CSY)* or *Tg(nkx2.5:ERCreER)*; *Tg(cmlc2:CSY)* embryos with ethanol, the solvent for 4-OHT, transiently between 8 hours post-fertilization (hpf) and the 14- to 16-somite stages (ss) (16–17 hpf) or continuously between 8 and 72 hpf (Fig. 1C). As expected, ZsYellow fluorescence was not observed under these experimental conditions (Fig. 1D,G; Table 1). Next, we confirmed the inducibility of ERCreER activity by exposing embryos continuously to 4-OHT between 8 and 72 hpf. Using this strategy, we anticipated labeling the entire ventricle because the *gata4* (Heicklen-Klein and Evans, 2004) and *nkx2.5* promoters (Chen and Fishman, 1996; Yelon et al., 1999; Zhou et al., 2011) remain active in the heart tube beyond ALPM stages. Accordingly, in both experimental groups, continuous 4-OHT exposure caused the large majority of ventricular myocardial cells to express ZsYellow, including those in the SHF-derived distal segment (Fig. 1E,F; Table 1). These data demonstrate that 4-OHT effectively induces ERCreER activity in both experimental groups of embryos and confirms the traceability of SHF-derived myocardium using these combinations of driver and reporter transgenes. Nonetheless, owing to persistent *gata4* and *nkx2.5* promoter activity beyond ALPM stages, continuous induction of ERCreER activity cannot address the question of SHF specification in the ALPM.

Therefore, we induced Cre activity transiently in *gata4*<sup>+</sup> and *nkx2.5*<sup>+</sup> ALPM cells between 75% epiboly (8 hpf) and the 14- to 16-somite stages (Fig. 1C). This developmental window encompasses establishment of the ALPM (Kimmel et al., 1995) and initiation of myocardial differentiation (Yelon et al., 1999). At 14- to 16-somite stages, embryos were rinsed extensively with embryo medium to remove residual 4-OHT and allowed to develop until 72 hpf when they were evaluated for cardiac ZsYellow expression in SHF-derived structures (Zhou et al., 2011). Following transient Cre induction in *gata4*<sup>+</sup> progenitors, we observed robust ZsYellow labeling of the entire ventricle, including the SHF-derived distal segment (Fig. 1H; Table 1). Furthermore, we observed ZsYellow labeling of cardiomyocytes in the proximal OFT (Fig. 1H; Table 1). These data demonstrate that SHF ventricular and OFT myocardial progenitors reside within the *gata4*<sup>+</sup> ALPM.



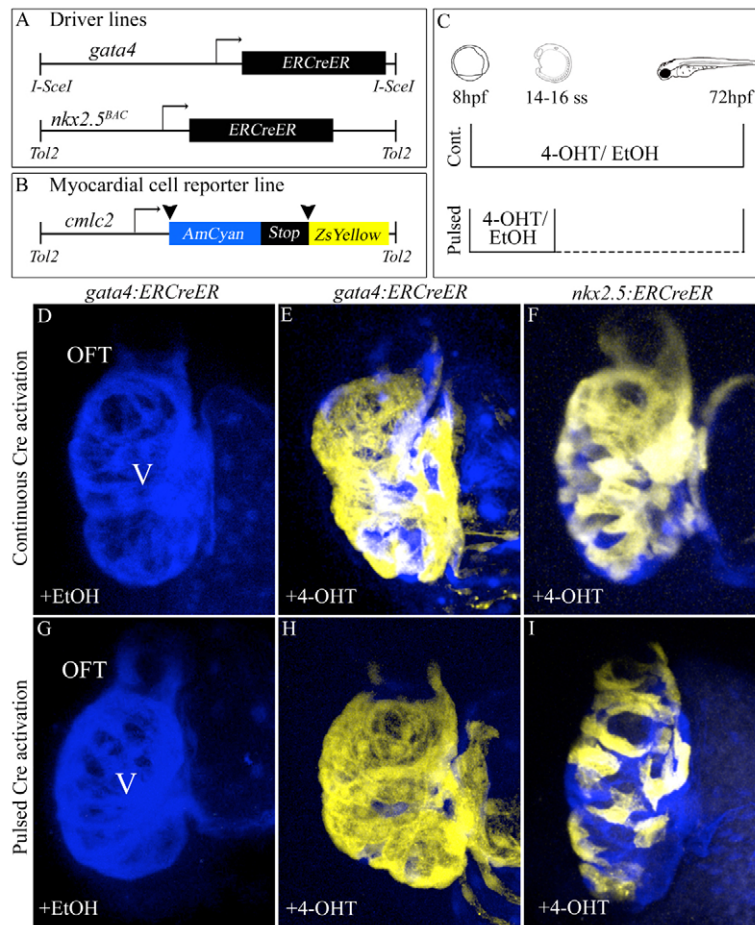

**Fig. 1. Specification of  $gata4^+$  and  $nkx2.5^+$  SHF myocardial progenitors in the zebrafish ALPM.** (A,B) Driver and reporter transgenes employed for inducible Cre/loxP-mediated myocardial lineage tracing of  $gata4^+$  and  $nkx2.5^+$  ALPM cells. (C) Experimental strategy. Double transgenic embryos were exposed continuously ('Cont.') to  $10 \mu\text{M}$  4-OHT or solvent alone (ethanol) between 8 and 72 hpf. Alternatively, embryos were exposed transiently ('Pulsed') to 4-OHT or ethanol between 8 hpf (75% epiboly) and the 14- to 16-somite stages prior to extensive rinsing with embryo medium (E3). All embryos were analyzed and imaged at 72 hpf for cardiac ZsYellow reporter fluorescence. (D,G) Hearts in  $Tg(gata4:ERCreER); Tg(cmlc2:CSY)$  embryos treated continuously (D) or transiently (G) with ethanol. (E,H) Hearts in  $Tg(gata4:ERCreER); Tg(cmlc2:CSY)$  embryos treated continuously (E) or transiently (H) with 4-OHT. (F,I) Hearts in  $Tg(nkx2.5:ERCreER); Tg(cmlc2:CSY)$  embryos treated continuously (F) or transiently (I) with 4-OHT. Hpf, hours post-fertilization; ss, somite stage; V, ventricle; OFT, outflow tract; EtOH, ethanol; 4-OHT, 4-hydroxytamoxifen.

Following transient Cre induction in  $nkx2.5^+$  ALPM cells, we observed indiscriminate partial labeling of the ventricle and OFT (Fig. 1I; Table 1). Both FHF-derived (proximal) and SHF-derived (distal) ventricular myocardial cells appeared to be labeled with equal frequency across all embryos we analyzed. This observation demonstrates that at least a fraction of SHF myocardial progenitors reside in the  $nkx2.5^+$  domain of the larger  $gata4^+$  ALPM.

### **$gata4^+$ and $nkx2.5^+$ SHF progenitors for OFT endothelial and smooth muscle lineages are specified within the ALPM**

Next, we tested the hypothesis that two additional SHF-derived lineages, endothelial and smooth muscle cells in the OFT (Zhou et al., 2011), also derive from  $gata4^+$  and  $nkx2.5^+$  regions of the

zebrafish ALPM. To achieve this, we generated four experimental groups of embryos, each with different pair-wise combinations of driver [either  $Tg(gata4:ERCreER)$  or  $Tg(nkx2.5:ERCreER)$ ] (Fig. 1A) and reporter [either  $Tg(kdrl:CSY)$  or  $Tg(eln2:CSY)$ ] (Fig. 2A,H) transgenes. The  $Tg(kdrl:CSY)$  and  $Tg(eln2:CSY)$  transgenes report contributions of Cre-expressing cells to OFT endothelial and smooth muscle lineages, respectively (Zhou et al., 2011). As expected, continuous and pulsed ethanol treatments of each experimental group failed to induce ZsYellow expression (Fig. 2B,E,I,L; Tables 2, 3). By contrast, continuous and pulsed treatments of all experimental groups with 4-OHT caused a modest proportion of OFT endothelial or smooth muscle cells to express the ZsYellow reporter protein (Fig. 2C,D,F,G,J,K,M,N; Tables 2, 3), indicating that at least a fraction of OFT cells derive from  $gata4^+$

**Table 1. Contributions of  $gata4^+$  and  $nkx2.5^+$  cells to ventricular and OFT myocardium**

| Driver line  | Reporter line | Treatment | Treatment window                   | Switching frequency |                    |     | Percentage of double transgenic embryos expressing ZsYellow | n   |
|--------------|---------------|-----------|------------------------------------|---------------------|--------------------|-----|-------------------------------------------------------------|-----|
|              |               |           |                                    | Distal ventricle    | Proximal ventricle | OFT |                                                             |     |
| $gata4:ECE$  | $cmlc2:CSY$   | 4-OHT     | 75% epiboly to 72 hpf              | ++                  | ++                 | ++  | >99%                                                        | 193 |
|              |               | Ethanol   |                                    | -                   | -                  | -   | 0%                                                          | 73  |
| $gata4:ECE$  | $cmlc2:CSY$   | 4-OHT     | 75% epiboly to 14-/16-somite stage | ++                  | ++                 | ++  | >99%                                                        | 104 |
|              |               | Ethanol   |                                    |                     |                    |     | 0%                                                          | 33  |
| $nkx2.5:ECE$ | $cmlc2:CSY$   | 4-OHT     | 75% epiboly to 72 hpf              | ++                  | ++                 | ++  | 94%                                                         | 56  |
|              |               | Ethanol   |                                    | -                   | -                  | -   | 0%                                                          | 24  |
| $nkx2.5:ECE$ | $cmlc2:CSY$   | 4-OHT     | 75% epiboly to 14-/16-somite stage | +                   | +                  | +   | 98%                                                         | 79  |
|              |               | Ethanol   |                                    | -                   | -                  | -   | 0%                                                          | 14  |

++, the majority of myocardial cells expressed ZsYellow; +, a fraction of myocardial cells expressed ZsYellow.

4-OHT, 4-hydroxytamoxifen; CSY, loxPAmCyanSTOPloxPZsYellow; ECE, ERCreER; n, number of double transgenic embryos; OFT, outflow tract.

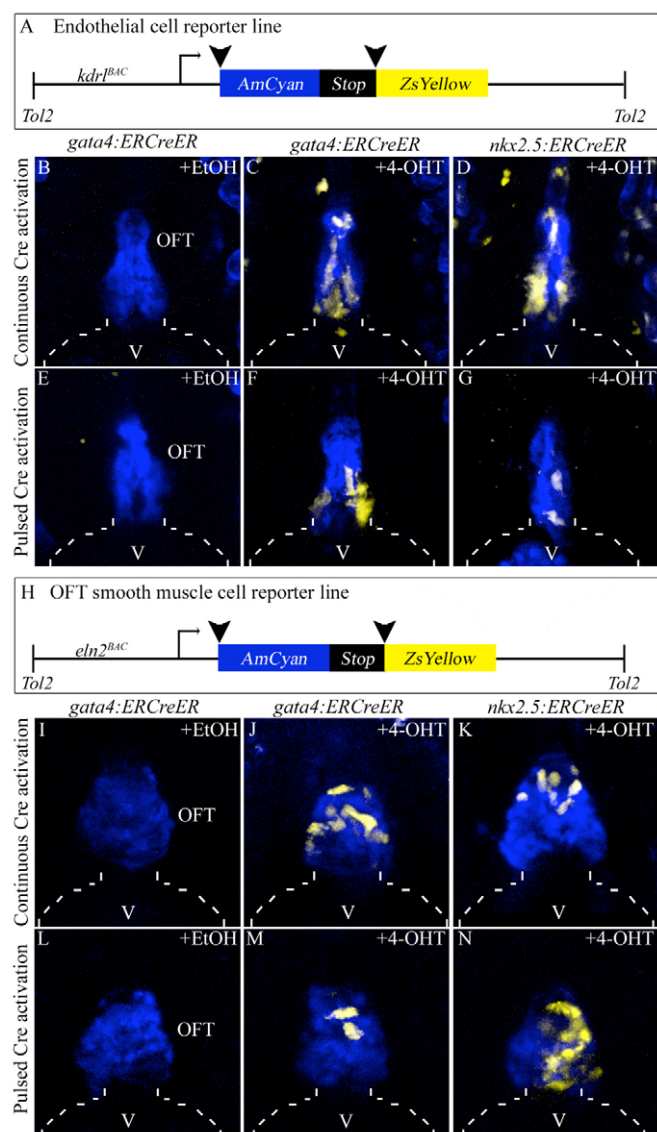

**Fig. 2. Specification of *gata4*<sup>+</sup> and *nkx2.5*<sup>+</sup> SHF endothelial and smooth muscle progenitors in the zebrafish ALPM.** (A) Schematic of the endothelial/endocardial reporter transgene. (B–G) OFT regions of 6 dpf double transgenic embryos treated continuously (8–72 hpf; B–D) or transiently (75% epiboly to 14– to 16-somite stages; E–G) with ethanol (B,E) or 4-OHT (C,D,F,G). (H) Schematic of the OFT smooth muscle reporter transgene. (I–N) OFT regions of 6 dpf double transgenic embryos treated continuously (8–72 hpf; I–K) or transiently (75% epiboly to 14–16 ss; L–N) with ethanol (I,L) or 4-OHT (J,K,M,N). Broken lines outline the ventricle (V). EtOH, ethanol; OFT, outflow tract; 4-OHT, 4-hydroxytamoxifen.

and *nkx2.5*<sup>+</sup> SHF progenitors specified in the ALPM. Across all embryos in any given experimental group, the labeled OFT cells appeared randomly distributed.

### Ubiquitous reporter transgene confirms SHF progenitor specification in the ALPM

The unlabeled ventricular (Fig. 1I) and OFT (Fig. 2) cells we observed in lineage-specific tracing experiments might reflect inefficiencies inherent to the loxP reporter strains (Hans et al., 2009; Ma et al., 2008; Mosimann et al., 2011) and/or Cre driver lines (Hans et al., 2009). Alternatively, the unlabeled cells might derive from an alternative progenitor population.

Because different loxP reporter lines can exhibit variable sensitivities to Cre activity based on integration site (Mosimann et al., 2011), we repeated the pulsed tracing of *gata4*<sup>+</sup> and *nkx2.5*<sup>+</sup> cells using a highly sensitive ubiquitous reporter line [*Tg(ubi:loxP-EGFP-loxP-mCherry)III*, abbreviated *Tg(ubi:Switch)*] (Mosimann et al., 2011). As anticipated, pulsed exposure of *Tg(gata4:ERCreER)*, *Tg(ubi:Switch)* or *Tg(nkx2.5:ERCreER)*, *Tg(ubi:Switch)* embryos to ethanol failed to induce expression of the mCherry reporter protein (Fig. 3B–D; data not shown). By contrast, pulsed exposure of *Tg(gata4:ERCreER)*, *Tg(ubi:Switch)* embryos to 4-OHT between 75% epiboly and the 14- to 16-somite stages caused a large majority of the ventricle to express the mCherry reporter protein (Fig. 3F), consistent with widespread ZsYellow labeling of the ventricular myocardium using the myocardial reporter strain (Fig. 1H). However, in the OFT, a much higher percentage of cells expressed mCherry (Fig. 3E–G) compared with the lineage-specific traces (Fig. 2F,M), indicating that the lineage-specific reporters underestimated the contributions made by *gata4*<sup>+</sup> cells to the OFT. Taken together, these data suggest that, at a minimum, a large majority of the zebrafish OFT derives from *gata4*<sup>+</sup> cells in the ALPM.

Following transient exposure of *Tg(nkx2.5:ERCreER)*; *Tg(ubi:Switch)* embryos to 4-OHT, only partial mCherry reporter labeling of the ventricle and OFT was observed (Fig. 3H–J), consistent with the partial ZsYellow labeling we observed using the lineage-restricted reporters (Fig. 1I; Fig. 2G,N). Because Cre tracing efficiencies can depend on 4-OHT dose (Hans et al., 2009), we attempted to increase the proportions of labeled cells by raising the treatment dose of 4-OHT. Unfortunately, higher 4-OHT doses (>10 μM) proved toxic to embryos (B.G.-A., C.E.B. and C.G.B., unpublished). Therefore, despite achieving maximal Cre induction in *Tg(nkx2.5:ERCreER)* embryos carrying a highly sensitive reporter, we failed to observe more than partial labeling of the ventricle and OFT (B.G.-A., C.E.B. and C.G.B., unpublished).

These findings raise two possibilities: (1) that all SHF-derived cells do in fact come from *nkx2.5*<sup>+</sup> cells in the ALPM but the driver strain we isolated was rate-limiting for maximal labeling, perhaps owing to a position effect; or (2) that the unlabeled cells derive from an *nkx2.5*<sup>-</sup> cell population. In an attempt to rule out the first possibility, we isolated another *Tg(nkx2.5:ERCreER)* strain. Unfortunately, compared with the original strain, the second insertion produced fewer labeled cells under the same conditions (B.G.-A., C.E.B. and C.G.B., unpublished).

### Photoconversion of *nkx2.5*<sup>+</sup> cells in the ALPM reveals extensive contributions to SHF-derived structures

In another attempt to distinguish these alternatives, we fate mapped ALPM *nkx2.5*<sup>+</sup> cells using Kaede photoconversion, a complementary approach to Cre/loxP lineage tracing not dependent on inducible enzymatic activity and reporter recombination. To achieve this, we generated a BAC transgenic strain, *Tg(nkx2.5:Kaede)*, expressing Kaede protein under the transcriptional control of the same *cis*-regulatory elements used previously (Zhou et al., 2011) (supplementary material Fig. S1). In *Tg(nkx2.5:Kaede)* embryos, the unconverted green Kaede protein was expressed robustly in the ALPM by 14- to 16-somite stages (Fig. 4A). At the same developmental stage (14–16 somites), we used UV light to completely and permanently photoconvert the Kaede protein from green to red fluorescence (Fig. 4B). UV-treated embryos were analyzed at 72 hpf for the distribution of persistent red Kaede protein in the ventricle and OFT. In a majority of



**Table 2. Contributions of *gata4*<sup>+</sup> and *nkx2.5*<sup>+</sup> cells to OFT endothelial cells**

| Driver line       | Reporter line   | Treatment | Treatment window                   | Percentage of double transgenic embryos expressing ZsYellow | <i>n</i> |
|-------------------|-----------------|-----------|------------------------------------|-------------------------------------------------------------|----------|
| <i>gata4:ECE</i>  | <i>kdrl:CSY</i> | 4-OHT     | 75% epiboly to 72 hpf              | >99%                                                        | 58       |
|                   |                 | Ethanol   |                                    | 0%                                                          | 27       |
| <i>gata4:ECE</i>  | <i>kdrl:CSY</i> | 4-OHT     | 75% epiboly to 14-/16-somite stage | 95%                                                         | 19       |
|                   |                 | EtOH      |                                    | 0%                                                          | 39       |
| <i>nkx2.5:ECE</i> | <i>kdrl:CSY</i> | 4-OHT     | 75% epiboly to 72 hpf              | 82%                                                         | 41       |
|                   |                 | Ethanol   |                                    | 0%                                                          | 15       |
| <i>nkx2.5:ECE</i> | <i>kdrl:CSY</i> | 4-OHT     | 75% epiboly to 14-/16-somite stage | 57%                                                         | 18       |
|                   |                 | Ethanol   |                                    | 0%                                                          | 20       |

4-OHT, 4-hydroxytamoxifen; CSY, loxPAmCyanSTOPloxPZsYellow; ECE, ERCreER; *n*, number of double transgenic embryos; OFT, outflow tract.

embryos, red fluorescence was observed relatively uniformly in the ventricle and OFT (Fig. 4C,D), reflecting a higher proportion of labeled cells when compared with the Cre/loxP traces (Fig. 1I; Fig. 2G,N; Fig. 3I). These data suggest that the Cre-based tracing underestimated the fraction of ventricular and OFT cells derived from *nkx2.5*<sup>+</sup> progenitors. Given the uniform labeling of the distal ventricle and OFT following Kaede photoconversion, we conclude that the large majority of, if not all, SHF progenitors are specified in the ALPM and express *nkx2.5*.

### Inhibition of zebrafish *Nkx2.5* function elicits SHF phenotypes

Mouse embryos lacking *nkx2.5* function die *in utero* from prominent SHF defects owing to compromised progenitor proliferation (Prall et al., 2007). To determine whether *Nkx2.5* is similarly required for SHF development in zebrafish, we analyzed *nkx2.5* morphant embryos for manifestations of SHF defects, including deficits in distal ventricular myocardium and OFT smooth muscle.

In the absence of an *nkx2.5* null allele, we knocked down *nkx2.5* by injecting one-cell stage embryos with a previously validated antisense morpholino that effectively inhibits splicing of the *nkx2.5* mRNA (supplementary material Fig. S2) (Targoff et al., 2008). Consistent with previous findings, we observed that morphant atria appeared somewhat misshapen and the ventricles were smaller (Fig. 5A,B). To determine whether the chamber morphology phenotypes reflected abnormal cardiomyocyte numbers, we counted fluorescent cardiomyocyte nuclei in control and *nkx2.5* morphant embryos carrying the *Tg(cmlc2:dsRec2-nuc)* transgene (Mably et al., 2003). Although the number of atrial cells was unaffected in the morphants, the number of ventricular cells was significantly reduced by 31% (Fig. 5A-C). To determine whether SHF-derived ventricular cardiomyocytes were preferentially affected in *nkx2.5* morphants, we injected the *nkx2.5* morpholino into *Tg(ltbp3:TagRFP2Acre); Tg(cmlc2:CSY)*

embryos, which express ZsYellow reporter protein in SHF-derived distal ventricular myocardium (Zhou et al., 2011). Whereas in control embryos, ZsYellow expression was seen in the distal half of the ventricular myocardium (Fig. 5D,F), morphant ventricles exhibited a significantly reduced number of cells labeled with ZsYellow (Fig. 5E,F), consistent with the conclusion that the distal SHF-derived segment of ventricular myocardium is compromised specifically in *nkx2.5* morphant embryos.

We also evaluated *nkx2.5* morphants for defects in *Eln2*<sup>+</sup> smooth muscle precursor cells in the OFT (Grimes et al., 2010; Grimes et al., 2006; Miao et al., 2007). These cells are derived from *gata4*<sup>+</sup>, *nkx2.5*<sup>+</sup> and *hand2*<sup>+</sup> SHF cells within the ALPM (Figs 2-4) (Hami et al., 2011), and at least partially from *ltbp3*<sup>+</sup> SHF cells within pharyngeal mesoderm (Zhou et al., 2011). Furthermore, defects in the formation of this cell population appear to be a general feature of SHF phenotypes in the zebrafish (Hami et al., 2011; Lasic and Scott, 2011; Zhou et al., 2011). Whereas control embryos exhibited robust *Eln2*<sup>+</sup> signals in the OFT, *nkx2.5* morphants exhibited either reduced or absent *Eln2* staining in the same region (Fig. 5G,H,J). Taken together, the combination of cardiomyocyte reductions localized to the distal ventricle and OFT smooth muscle defects indicates that *nkx2.5* morphants harbor phenotypes characteristic of SHF perturbations.

To address morpholino specificity, we attempted to rescue the OFT and ventricular cardiomyocyte deficiencies in *nkx2.5* morphants by co-injecting embryos with morpholino and *nkx2.5* mRNA. Co-injecting the mRNA partially rescued the OFT defect as the percentage of phenotypic animals decreased from 72% to 31% (Fig. 5G-J). Similarly, mRNA co-injection boosted ventricular cardiomyocyte numbers by 53% (Fig. 5K-N), indicating a partial rescue. Taken together, these observations support specificity of the *nkx2.5* morpholino.

The cardiac phenotype we documented in *nkx2.5* morphants virtually phenocopies *ltbp3* morphants (Zhou et al., 2011), which

**Table 3. Contributions of *gata4*<sup>+</sup> and *nkx2.5*<sup>+</sup> cells to OFT smooth muscle cells**

| Driver line       | Reporter line   | Treatment | Treatment window                   | Percentage double transgenic embryos expressing ZsYellow | <i>n</i> |
|-------------------|-----------------|-----------|------------------------------------|----------------------------------------------------------|----------|
| <i>gata4:ECE</i>  | <i>eln2:CSY</i> | 4-OHT     | 75% epiboly to 72 hpf              | >99%                                                     | 35       |
|                   |                 | Ethanol   |                                    | 0%                                                       | 20       |
| <i>gata4:ECE</i>  | <i>eln2:CSY</i> | 4-OHT     | 75% epiboly to 14-/16-somite stage | 96%                                                      | 40       |
|                   |                 | Ethanol   |                                    | 0%                                                       | 16       |
| <i>nkx2.5:ECE</i> | <i>eln2:CSY</i> | 4-OHT     | 75% epiboly to 72 hpf              | 75%                                                      | 22       |
|                   |                 | EtOH      |                                    | 0%                                                       | 15       |
| <i>nkx2.5:ECE</i> | <i>eln2:CSY</i> | 4-OHT     | 75% epiboly to 14-/16-somite stage | 45%                                                      | 22       |
|                   |                 | Ethanol   |                                    | 0%                                                       | 15       |

4-OHT, 4-hydroxytamoxifen; CSY, loxPAmCyanSTOPloxPZsYellow; ECE, ERCreER; *n*, number of double transgenic embryos; OFT, outflow tract.

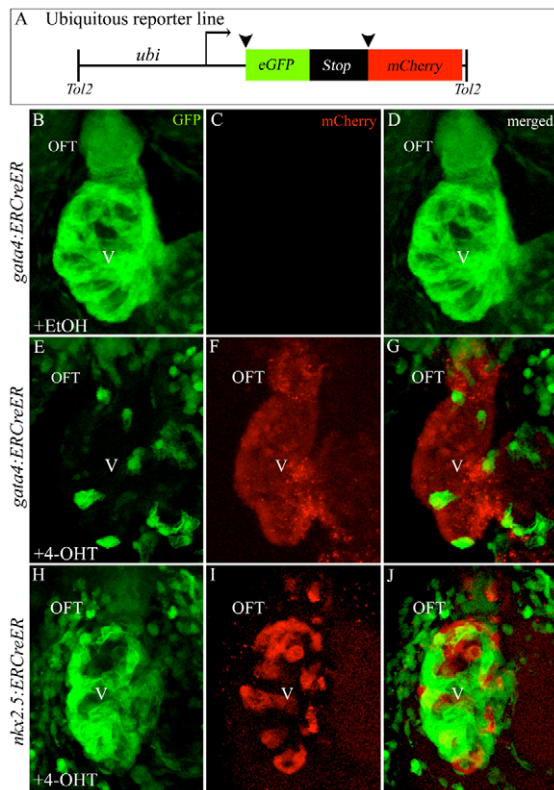

**Fig. 3. Ubiquitous reporter transgene corroborates specification of *gata4*<sup>+</sup> and *nkx2.5*<sup>+</sup> SHF progenitors in the ALPM.** (A) Ubiquitous reporter transgene. (B–J) Hearts in 72 hpf double transgenic embryos treated transiently (75% epiboly to 14- to 16-somite stages) with ethanol [B–D; *n*=0/8 double transgenic embryos with cardiac mCherry reporter fluorescence; for *nkx2.5* trace (hearts not shown), *n*=0/17 with reporter fluorescence] or 4-OHT (E–J) imaged in the green (B,E,H) and red (C,F,I) channels. Merged images are shown in D,G,J. *n*=18/18 double transgenic embryos with cardiac mCherry reporter fluorescence for E–G. *n*=15/15 with reporter fluorescence for H–J. OFT, outflow tract; V, ventricle; EtOH, ethanol; 4-OHT, 4-hydroxytamoxifen.

raises the possibility that *nkx2.5* and *ltbp3* reside in a common genetic pathway. Most likely, *nkx2.5* functions upstream of *ltbp3* based on the observation that SHF progenitors express *nkx2.5* in the ALPM prior to initiating expression of *ltbp3* in pharyngeal mesoderm [this study and (Zhou et al., 2011)]. To test this hypothesis, we performed *in situ* hybridization for *ltbp3* transcripts in *nkx2.5* morphants. At the 23-somite stage (20.5 hpf), when *ltbp3* expression initiates in the cardiac cone, no obvious difference in *ltbp3* expression was observed between control and morphant embryos. (Fig. 6A,B), suggesting that SHF progenitors were specified properly in *nkx2.5* morphants. However, after the linear heart tube is established (28 hpf), we observed a qualitative decrease in the intensity and breadth of *ltbp3* expression at the heart tube arterial pole (Fig. 6C,D). Using quantitative PCR, we learned that *nkx2.5* morphants express approximately half the number of *ltbp3* transcripts (Fig. 6E), suggesting that *nkx2.5* is required to maintain *ltbp3* expression.

Next, we sought to determine the mechanism by which *nkx2.5* is required for SHF development. To achieve this, we analyzed *nkx2.5* morphants for evidence of apoptosis overlapping spatially and temporally with the loss of *ltbp3* expression in the SHF. Specifically, we injected the *nkx2.5* morpholino into secA5-YFP-expressing

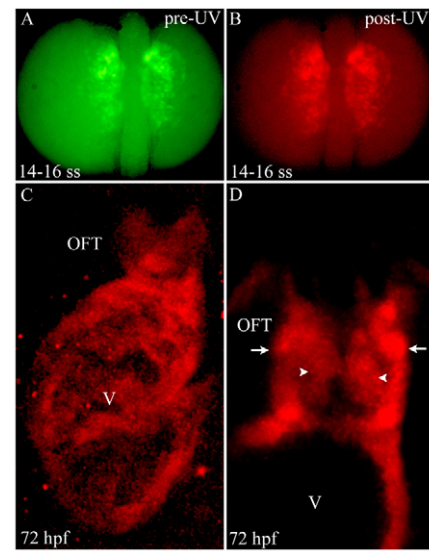

**Fig. 4. Photoconversion of *nkx2.5*<sup>+</sup> cells in the ALPM reveals widespread contributions to SHF-derived structures.** (A,B) Dorsal images of a 14- to 16-somite stage *Tg(nkx2.5:Kaede)* embryo before (A) and after (B) photoconversion with ultraviolet (UV) light. (C) Confocal z-stack image of the ventricle (V) and OFT at 72 hpf. (D) Confocal slice of the OFT. Arrowheads and arrows highlight endothelial and smooth muscle precursor cells in the OFT, respectively. Six out of eight photoconverted embryos exhibited red Kaede protein throughout the ventricle and OFT. ss, somite stage; OFT, outflow tract; hpf, hours post-fertilization.

embryos that report apoptotic cells (van Ham et al., 2010). We found no evidence for SHF apoptosis in control or morphant embryos at cardiac cone (23 somite stage) or linear heart tube (24 hpf) stages (supplementary material Fig. S3), despite obvious reporter fluorescence in other embryonic regions, including the brain (not shown). Next, we used the thymidine analog EdU to measure proliferation of SHF progenitors in control and morphant *Tg(nkx2.5:ZsYellow)* embryos at 23 hpf. At this developmental stage, the heart is a nascent tube (Yelon et al., 1999) with non-myocardial *nkx2.5*<sup>+</sup>, *ltbp3*<sup>+</sup> SHF progenitors residing at its arterial pole (Zhou et al., 2011). We detected double-positive (EdU<sup>+</sup>, ZsYellow<sup>+</sup>) cells predominantly in the arterial pole/SHF region of the developing *nkx2.5*<sup>+</sup> heart tube (Fig. 6F–I). On average, control and morphant embryos harbored eight and one double-positive cells, respectively, in this region (Fig. 6G,I,J) demonstrating that SHF proliferation is compromised in the absence of Nkx2.5 function.

Because *nkx2.5* and *ltbp3* morphant embryos both show prominent SHF defects caused by compromised progenitor proliferation, we tested the hypothesis that *nkx2.5* and *ltbp3* interact genetically for optimal SHF development by injecting low doses of each morpholino either individually or together. When the morpholinos were injected individually, the majority of embryos in each experimental group exhibited wild-type Eln2 staining in the OFT (Fig. 7A,B,D), and small percentages displayed reduced Eln2 staining. By contrast, co-injecting both morpholinos at the same low doses caused a reduction in Eln2 staining in a majority of embryos and a complete lack of Eln2 staining in ~25% of embryos (Fig. 7A–D). These data demonstrate a genetic interaction between *nkx2.5* and *ltbp3*, suggesting that they cooperate functionally during SHF development.

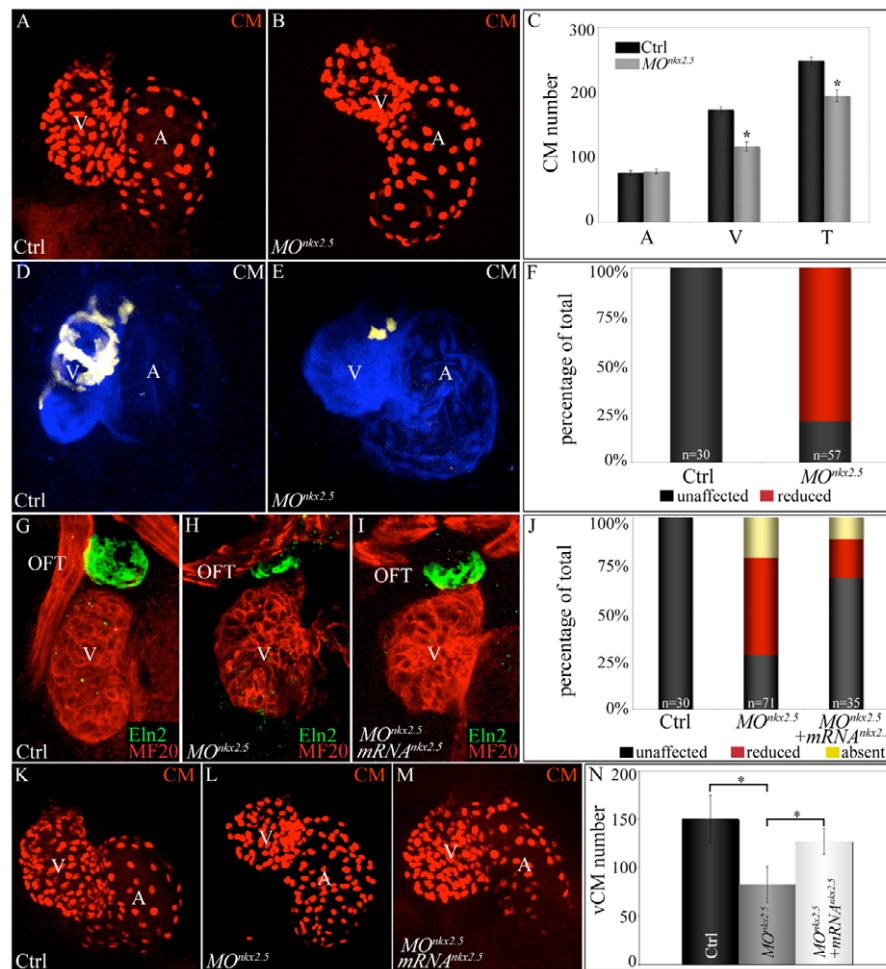

**Fig. 5. Morpholino-mediated inhibition of *nkx2.5* pre-mRNA splicing elicits SHF phenotypes.** (A–C) *nkx2.5* morphants display ventricular cardiomyocyte deficits. z-stack images of hearts in control (A) and *nkx2.5* morpholino-injected (B) *Tg(cmlc2:dsRed2-nuc)* embryos imaged at 72 hpf. (C) Average numbers of atrial (A), ventricular (V) and total (T) cardiomyocytes in control ( $n=6$ ) and morphant ( $n=11$ ) embryos. Error bars represent one s.d. \* $P<0.001$ . (D–F) SHF-derived ventricular myocardium is specifically reduced in *nkx2.5* morphants. Control (D) and morpholino-injected (E) *Tg(ltbp3:TagRFP2Acre); Tg(cmlc2:CSY)* embryos imaged in the blue and yellow channels (merged images shown) by confocal microscopy at 72 hpf. (F) The percentages of embryos with reduced ventricular ZsYellow expression. The  $n$  values are reported in the graph. (G–J) *nkx2.5* morphants exhibit reductions in *Eln2*<sup>+</sup> OFT cells, a phenotype partially rescued by co-injection of *nkx2.5* mRNA. Control (G; unaffected), morphant (H; reduced) and mRNA-injected morphant (I; unaffected) embryos were co-stained at 72 hpf with MF20 and anti-*Eln2* antibodies to label myocardium (red) and OFT smooth muscle (green), respectively. (J) Percentages of embryos with unaffected, reduced or absent *Eln2* staining. The  $n$  values are reported in the graph. (K–N) Injection of *nkx2.5* mRNA partially rescues the ventricular cardiomyocyte deficit in *nkx2.5* morphants. Control (K), morphant (L) and mRNA-injected morphant (M) *Tg(cmlc2:dsRed2-nuc)* embryos imaged by confocal microscopy at 72 hpf. (N) Average numbers of ventricular cardiomyocytes (vCMs) in each experimental group ( $n=4$  per cohort). Error bars represent one s.d. \* $P<0.05$ . CM, cardiomyocytes; V, ventricle; A, atrium; OFT, outflow tract; Ctrl, control; MO, morpholino.

## DISCUSSION

Using Cre/loxP and Kaede lineage tracing, we explored the spatiotemporal characteristics of SHF progenitor specification in zebrafish embryos. We performed these studies because the recently discovered SHF-specific marker in zebrafish, *ltbp3*, is not detectable in the ALPM, the site of SHF specification in higher vertebrates. Based on evolutionary conservation of vertebrate cardiogenesis (Olson, 2006), we hypothesized that zebrafish SHF progenitor specification also occurs in the ALPM prior to SHF upregulation of *ltbp3* in midline pharyngeal mesoderm. Alternatively, considering that zebrafish hearts have a single ventricle (Bakkers, 2011), and that ~450 million years have passed since zebrafish and mammals diverged (Kumar and Hedges, 1998), we could not ignore the possibility that key features of SHF specification might differ in zebrafish.

Two prior reports provided initial support for ALPM specification of zebrafish SHF progenitors. First, fate mapping the zebrafish ALPM revealed mediolateral patterning of myocardial progenitors similar to that in higher vertebrates (Abu-Issa and Kirby, 2007; Schoenebeck et al., 2007), demonstrating that the overriding organization of the ALPM is conserved. Second, during the course of our study, Hami et al. (Hami et al., 2011) reported that dye tracing of ALPM cells within the zebrafish *hand2*<sup>+</sup> heart forming region traced to SHF-derived myocardial and smooth muscle fates (Hami et al., 2011) consistent with the conclusion that at least some SHF progenitors are specified in the zebrafish ALPM.

Using Cre/loxP and Kaede lineage tracing of ALPM cells, we have confirmed and extended previous findings by demonstrating that: (1) as in higher vertebrates, the large majority of SHF



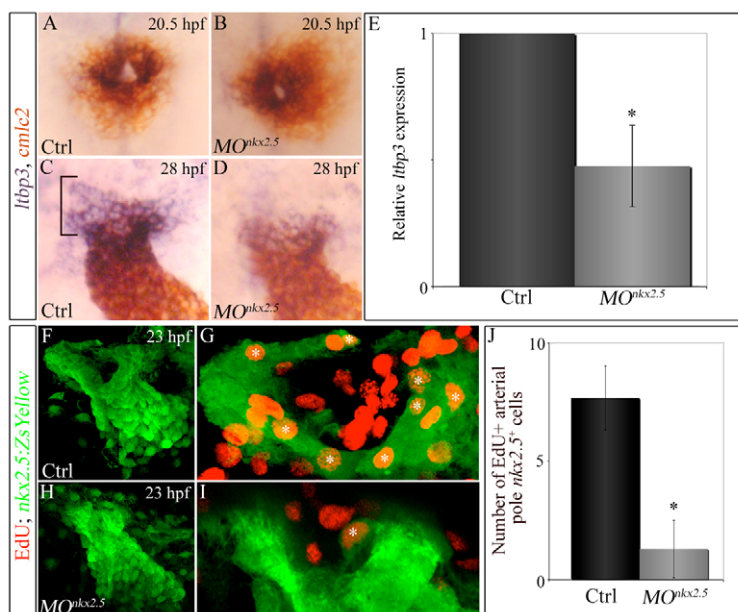

**Fig. 6. Knocking down *nkx2.5* compromises arterial-pole *Itbp3* expression and SHF proliferation.** (A–D) Double *in situ* hybridization of *cmlc2* and *Itbp3* transcripts in control (A,C) and morphant (B,D) embryos at 20.5 (23-somite stage, cardiac cone stage;  $n=20$ , control;  $n=32$ , morphant) and 28 (linear heart tube stage;  $n=20$ , control;  $n=30/48$  morphants) hpf. Bracket highlights non-myocardial *Itbp3*<sup>+</sup> SHF progenitors. (E) Graph showing the average relative abundance of *Itbp3* transcripts in morphant compared with control embryos at 28 hpf determined by quantitative PCR. Error bar represents one s.d., \* $P<0.05$ . (F–J) *nkx2.5* morphants exhibit reductions in proliferating arterial-pole *nkx2.5*<sup>+</sup> SHF cells. At 23 hpf, control and morphant *Tg(nkx2.5:ZsYellow)* embryos were double immunostained for incorporated EdU (red) and ZsYellow protein (green). Confocal z-stack images of heart tube regions in control (F,G) and morphant (H,I) embryos captured through green and red filters. (F,H) Flattened z-stack images (green channel only) of representative control (F) and morphant (H) heart tubes. (G,I) Arterial poles of heart tubes shown in F and H. Three contiguous confocal slices (red and green channels merged) from F and H were flattened. White asterisks mark double-positive cells (EdU<sup>+</sup> red nuclei surrounded by ZsYellow<sup>+</sup> green cellular fluorescence). (H) Average numbers of double-positive cells in control and morphant heart tubes.  $n=6$  embryos per experimental group. Error bars represent one s.d., \* $P<0.0001$ . hpf, hours post-fertilization; Ctrl, control; MO, morpholino.

progenitors for ventricular and OFT lineages are specified medially in the heart forming region of the ALPM; (2) the molecular signature of zebrafish ALPM SHF progenitors is *gata4*<sup>+</sup> (this study), *nkx2.5*<sup>+</sup> (this study) and *hand2*<sup>+</sup> (Hami et al., 2011); and (3) the initiation of *Itbp3* expression does not coincide temporally with SHF specification, consistent with our original conclusion that *Itbp3/TGF $\beta$*  signaling controls SHF proliferation (Zhou et al., 2011).

To date, bona fide SHF defects have been documented in several experimental groups of zebrafish embryos. From these studies, several factors (Tbx1, Mef2c, Isl1, Ajuba) and signaling pathways (Fgf, Bmp, Tgf $\beta$ , Hh, RA) have been implicated in zebrafish SHF development (de Pater et al., 2009; Hami et al., 2011; Hinits et al., 2012; Lazic and Scott, 2011; Witzel et al., 2012; Zhou et al., 2011; Nevis et al., 2013). Many of these pathways perform indispensable functions during SHF development in higher vertebrates (Black, 2007; Rochais et al., 2009), suggesting that genetic control of SHF development is broadly conserved across vertebrates.

Despite the similarities between SHF development in higher and lower vertebrates, important differences are also apparent. First, although the mouse SHF comprises anterior and posterior subdivisions that contribute cardiac tissue to the arterial and venous poles, respectively, it remains unclear whether a bona fide posterior SHF equivalent exists in zebrafish. De Pater et al. reported that two waves of cardiomyocyte differentiation build the zebrafish heart (de Pater et al., 2009). The first wave establishes the linear heart tube and is complete by 24 hpf (de Pater et al., 2009; Lazic and Scott, 2011). The second wave, mediated by the anterior SHF equivalent, occurs exclusively at the arterial pole (de Pater et al., 2009; Hami

et al., 2011; Lazic and Scott, 2011; Zhou et al., 2011). Two recent reports indicate that *isll*<sup>+</sup> and *mef2cb*<sup>+</sup> cells reside at the venous pole of the heart tube after the first wave of differentiation is complete (Hinits et al., 2012; Witzel et al., 2012), suggesting that a posterior SHF population might exist in that location.

The ventricular endocardial potential of SHF progenitors also appears to differ between higher and lower vertebrates. In higher vertebrates, SHF progenitors give rise to a measurable part of the right ventricular endocardium (Cai et al., 2003; Milgrom-Hoffman et al., 2011; Moretti et al., 2006; Verzi et al., 2005). However, SHF cells expressing *nkx2.5* in the ALPM or *Itbp3* in pharyngeal mesoderm do not harbor ventricular endocardial fates (B.G.-A., C.E.B. and C.G.B., unpublished) (Zhou et al., 2011). By contrast, *gata4*<sup>+</sup> ALPM cells did lineage trace to ventricular endocardium (B.G.-A., C.E.B. and C.G.B., unpublished). These findings are consistent with the ALPM fate map produced by Schoenebeck et al. (Schoenebeck et al., 2007) and previous findings demonstrating that none of the ventricular endocardium derives from late-differentiating endocardial cells (Lazic and Scott, 2011). Potentially, distal ventricular endocardial cells might arise from pre-existing ventricular endocardial cells within the heart tube that proliferate and migrate anti-parallel to the SHF derived-myocardium being accreted to the arterial pole (Lazic and Scott, 2011). Consistent with this hypothesis, the endocardium of the linear heart tube is highly proliferative (de Pater et al., 2009).

*In vitro* differentiation studies, or clonal assays, have been used to demonstrate multipotency of SHF progenitors in mammals (Bu et al., 2009; Moretti et al., 2006; Wu et al., 2006) and avians (Hutson et al., 2010). This study and previous studies (Zhou et al., 2011) have

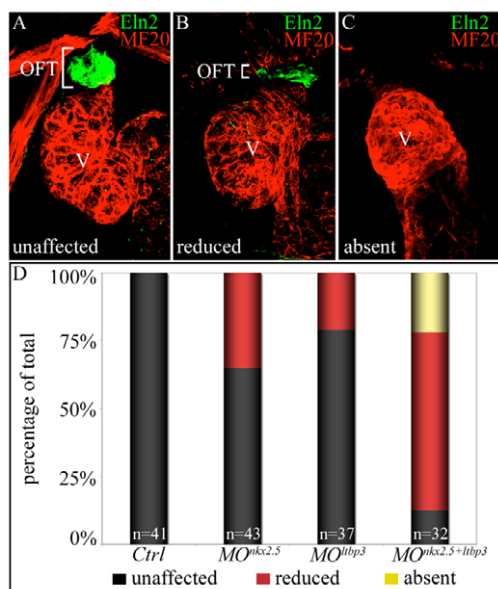

**Fig. 7. *nkx2.5* and *ltbp3* interact genetically during zebrafish SHF development.** (A–C) *nkx2.5* and *ltbp3* morpholinos were injected alone or together into one-cell stage embryos. Total morpholino mass remained constant between experimental groups (see Materials and methods). Injected embryos were processed at 72 hpf for MF20 (myocardium; red) and Eln2 (OFT smooth muscle; green) double immunostaining. Embryos were binned into three phenotypic classes, unaffected (A), reduced (B) or absent (C), based on Eln2 OFT signal. White brackets highlight Eln2 staining. (D) Percentages of embryos in each phenotypic class according to experimental group. The *n* values are reported in the graph. OFT, outflow tract; V, ventricle; Ctrl, control; MO, morpholino.

demonstrated that zebrafish populations individually positive for *gata4*, *nkx2.5* and *ltbp3* trace to all three lineages *in vivo*. However, based on these results alone, and in the absence of a zebrafish clonal assay, we cannot reach a conclusion regarding the multipotency of the traced cell populations because pre-existing lineage restriction within the SHF would yield the same lineage tracing results. Indeed, a recent report demonstrated that lineage restriction of endocardial and myocardial progenitors exists within the SHF of higher vertebrates (Milgrom-Hoffman et al., 2011). If lineage diversification were to pre-exist within the SHF region of the ALPM and/or pharyngeal mesoderm, then specific SHF subpopulations might express unique genetic markers. Nonetheless, the degree of cellular heterogeneity within the zebrafish SHF remains unexplored currently.

*Nkx2.5*-null mice exhibit severe SHF defects manifested as reductions in the primitive right ventricle and OFT segments of the looping heart tube (Prall et al., 2007). We found that knocking down *nkx2.5* with a previously validated morpholino (Targoff et al., 2008) causes similar gross phenotypes, including reductions in distal SHF-derived ventricular myocardium and OFT smooth muscle. Furthermore, we documented a reduction in SHF expression of *ltbp3* and a SHF proliferation deficiency also present in *ltbp3* morphants (Zhou et al., 2011). These data raise the possibility that *nkx2.5* resides genetically upstream of *ltbp3* to stimulate proliferation of SHF progenitors (Prall et al., 2007). Consistent with this model, we uncovered a genetic interaction between *nkx2.5* and *ltbp3* during SHF-mediated OFT development. The cellular function of *nkx2.5* as a driver of SHF progenitor proliferation appears to be evolutionarily conserved as *Nkx2.5*-null mice also exhibit defects in SHF progenitor proliferation (Prall et al., 2007).

Because human *NKX2.5* mutations cause congenital heart defects consistent with SHF perturbations, including tetralogy of Fallot and double outlet right ventricle (Benson et al., 1999; McElhinney et al., 2003; Nakajima, 2010), elucidating the factors and pathways upstream and downstream of *nkx2.5* during vertebrate SHF development will inform clinical strategies to reduce the morbidity and mortality associated with these congenital defects. Furthermore, because SHF progenitors exhibit multipotency and self-renewing capabilities (Bu et al., 2009; Laugwitz et al., 2005; Moretti et al., 2006; Wu et al., 2006), they hold great potential for supporting cardiac regenerative therapies. Therefore, the genetic and environmental determinants of SHF development are deserving of continued intensive investigation using all relevant model organisms.

#### Acknowledgements

We thank J. Holzschuh (University of Freiburg, Germany) for providing a detailed Click-iT EdU labeling and detection protocol, W. Chen (Vanderbilt University, Nashville, TN, USA) for providing a plasmid with the coding sequence for ERT2CreERT2, F. Keeley (The Hospital for Sick Children, Toronto, Canada) for providing Eln2 anti-serum, The Developmental Studies Hybridoma Bank (University of Iowa) for providing MF20 antibody, T. J. van Ham and R. T. Peterson (Massachusetts General Hospital, Charlestown, MA, USA) for providing secA5-YFP expressing transgenic embryos, and the Massachusetts General Hospital Nephrology Division for access to their confocal microscopy facilities.

#### Funding

B.G.-A. was funded by an American Heart Association (AHA) Post-Doctoral Fellowship [10POST4170037], N.P.-L. was funded by the Harvard Stem Cell Institute (HSCI) Training Program for Post-Doctoral Fellows [5T32HL087735], M.S.A. was funded by the Cell and Molecular Training Grant For Cardiovascular Biology [5T32HL007208], K.R.N. was funded by a National Research Service Award [5F32HL110627] from the National Heart, Lung and Blood Institute (NHLBI). This work was funded by awards from the NHLBI [5R01HL111179], the March of Dimes Foundation [1-FY12-467] and the HSCI (Seed Grant and Young Investigator Award) to C.E.B.; and by NHLBI [5R01HL096816], AHA [Grant in Aid number 10GRNT4270021] and HSCI (Seed Grant) awards to C.G.B. Deposited in PMC for release after 12 months.

#### Author contributions

C.E.B., C.G.B. and B.G.-A. conceived the study; B.G.-A. performed the majority of experiments; N.P.-L., M.S.A., K.R.N., L.J. and P.O. performed experiments. B.G.-A., C.E.B. and C.G.B. analyzed data. K.K. and K.D.P. provided the *Tg(gata4:ERCreER)* transgenic strain. C.G.B., C.E.B. and B.G.-A. wrote the manuscript with input from all authors.

#### Supplementary material

Supplementary material available online at <http://dev.biologists.org/lookup/suppl/doi:10.1242/dev.088351/-DC1>

#### References

- Abramoff, M. D., Magelhaes, P. J. and Ram, S. J. (2004). Image processing with ImageJ. *Biophotonics International* **11**, 36–42.
- Abu-Issa, R. and Kirby, M. L. (2007). Heart field: from mesoderm to heart tube. *Annu. Rev. Cell Dev. Biol.* **23**, 45–68.
- Ando, R., Hama, H., Yamamoto-Hino, M., Mizuno, H. and Miyawaki, A. (2002). An optical marker based on the UV-induced green-to-red photoconversion of a fluorescent protein. *Proc. Natl. Acad. Sci. USA* **99**, 12651–12656.
- Bajolle, F., Zaffran, S., Kelly, R. G., Hadchouel, J., Bonnet, D., Brown, N. A. and Buckingham, M. E. (2006). Rotation of the myocardial wall of the outflow tract is implicated in the normal positioning of the great arteries. *Circ. Res.* **98**, 421–428.
- Bakkers, J. (2011). Zebrafish as a model to study cardiac development and human cardiac disease. *Cardiovasc. Res.* **91**, 279–288.
- Benson, D. W., Silberbach, G. M., Kavanaugh-McHugh, A., Cottrill, C., Zhang, Y., Riggs, S., Smalls, O., Johnson, M. C., Watson, M. S., Seidman, J. G. et al. (1999). Mutations in the cardiac transcription factor NKX2.5 affect diverse cardiac developmental pathways. *J. Clin. Invest.* **104**, 1567–1573.
- Black, B. L. (2007). Transcriptional pathways in second heart field development. *Semin. Cell Dev. Biol.* **18**, 67–76.
- Bruneau, B. G. (2008). The developmental genetics of congenital heart disease. *Nature* **451**, 943–948.
- Bu, L., Jiang, X., Martin-Puig, S., Caron, L., Zhu, S., Shao, Y., Roberts, D. J., Huang, P. L., Domian, I. J. and Chien, K. R. (2009). Human ISL1 heart

- progenitors generate diverse multipotent cardiovascular cell lineages. *Nature* **460**, 113-117.
- Cai, C. L., Liang, X., Shi, Y., Chu, P. H., Pfaff, S. L., Chen, J. and Evans, S. (2003). Isl1 identifies a cardiac progenitor population that proliferates prior to differentiation and contributes a majority of cells to the heart. *Dev. Cell* **5**, 877-889.
- Chen, J. N. and Fishman, M. C. (1996). Zebrafish tinman homolog demarcates the heart field and initiates myocardial differentiation. *Development* **122**, 3809-3816.
- de Pater, E., Clijsters, L., Marques, S. R., Lin, Y. F., Garavito-Aguilar, Z. V., Yelon, D. and Bakkers, J. (2009). Distinct phases of cardiomyocyte differentiation regulate growth of the zebrafish heart. *Development* **136**, 1633-1641.
- Dyer, L. A. and Kirby, M. L. (2009). The role of secondary heart field in cardiac development. *Dev. Biol.* **336**, 137-144.
- Elliott, D. A., Kirk, E. P., Yeoh, T., Chandar, S., McKenzie, F., Taylor, P., Grossfeld, P., Fatkin, D., Jones, O., Hayes, P. et al. (2003). Cardiac homeobox gene NKX2-5 mutations and congenital heart disease: associations with atrial septal defect and hypoplastic left heart syndrome. *J. Am. Coll. Cardiol.* **41**, 2072-2076.
- Epstein, J. A. (2010). Franklin H. Epstein Lecture. Cardiac development and implications for heart disease. *N. Engl. J. Med.* **363**, 1638-1647.
- Feng, H., Stachura, D. L., White, R. M., Gutierrez, A., Zhang, L., Sanda, T., Jette, C. A., Testa, J. R., Neubergh, D. S., Langenau, D. M. et al. (2010). T-lymphoblastic lymphoma cells express high levels of BCL2, S1P1, and ICAM1, leading to a blockade of tumor cell intravasation. *Cancer Cell* **18**, 353-366.
- Grimes, A. C., Stadt, H. A., Shepherd, I. T. and Kirby, M. L. (2006). Solving an enigma: arterial pole development in the zebrafish heart. *Dev. Biol.* **290**, 265-276.
- Grimes, A. C., Durán, A. C., Sans-Coma, V., Hami, D., Santoro, M. M. and Torres, M. (2010). Phylogeny informs ontogeny: a proposed common theme in the arterial pole of the vertebrate heart. *Evol. Dev.* **12**, 552-567.
- Hami, D., Grimes, A. C., Tsai, H. J. and Kirby, M. L. (2011). Zebrafish cardiac development requires a conserved secondary heart field. *Development* **138**, 2389-2398.
- Hans, S., Kaslin, J., Freudenreich, D. and Brand, M. (2009). Temporally-controlled site-specific recombination in zebrafish. *PLoS ONE* **4**, e4640.
- Heicklen-Klein, A. and Evans, T. (2004). T-box binding sites are required for activity of a cardiac GATA-4 enhancer. *Dev. Biol.* **267**, 490-504.
- Hinits, Y., Pan, L., Walker, C., Dowd, J., Moens, C. B. and Hughes, S. M. (2012). Zebrafish Mef2ca and Mef2cb are essential for both first and second heart field cardiomyocyte differentiation. *Dev. Biol.* **369**, 199-210.
- Hutson, M. R., Zeng, X. L., Kim, A. J., Antoon, E., Harward, S. and Kirby, M. L. (2010). Arterial pole progenitors interpret opposing FGF/BMP signals to proliferate or differentiate. *Development* **137**, 3001-3011.
- Ilagan, R., Abu-Issa, R., Brown, D., Yang, Y. P., Jiao, K., Schwartz, R. J., Klingensmith, J. and Meyers, E. N. (2006). Fgf8 is required for anterior heart field development. *Development* **133**, 2435-2445.
- Kelly, R. G. (2012). The second heart field. *Curr. Top. Dev. Biol.* **100**, 33-65.
- Kelly, R. G., Brown, N. A. and Buckingham, M. E. (2001). The arterial pole of the mouse heart forms from Fgf10-expressing cells in pharyngeal mesoderm. *Dev. Cell* **1**, 435-440.
- Kikuchi, K., Holdway, J. E., Werdrich, A. A., Anderson, R. M., Fang, Y., Egnaczyk, G. F., Evans, T., Macrae, C. A., Stainier, D. Y. and Poss, K. D. (2010). Primary contribution to zebrafish heart regeneration by gata4(+) cardiomyocytes. *Nature* **464**, 601-605.
- Kimmel, C. B., Ballard, W. W., Kimmel, S. R., Ullmann, B. and Schilling, T. F. (1995). Stages of embryonic development of the zebrafish. *Dev. Dyn.* **203**, 253-310.
- Kumar, S. and Hedges, S. B. (1998). A molecular timescale for vertebrate evolution. *Nature* **392**, 917-920.
- Laugwitz, K. L., Moretti, A., Lam, J., Gruber, P., Chen, Y., Woodard, S., Lin, L. Z., Cai, C. L., Lu, M. M., Reth, M. et al. (2005). Postnatal Isl1+ cardioblasts enter fully differentiated cardiomyocyte lineages. *Nature* **433**, 647-653.
- Lazic, S. and Scott, I. C. (2011). Mef2cb regulates late myocardial cell addition from a second heart field-like population of progenitors in zebrafish. *Dev. Biol.* **354**, 123-133.
- Ma, Q., Zhou, B. and Pu, W. T. (2008). Reassessment of Isl1 and Nkx2-5 cardiac fate maps using a Gata4-based reporter of Cre activity. *Dev. Biol.* **323**, 98-104.
- Mably, J. D., Mohideen, M. A., Burns, C. G., Chen, J. N. and Fishman, M. C. (2003). Heart of glass regulates the concentric growth of the heart in zebrafish. *Curr. Biol.* **13**, 2138-2147.
- Mahler, G. J. and Butcher, J. T. (2011). Cardiac developmental toxicity. *Birth Defects Res. C Embryo Today* **93**, 291-297.
- Mahler, J., Filippi, A. and Driever, W. (2010). DeltaA/DeltaD regulate multiple and temporally distinct phases of notch signaling during dopaminergic neurogenesis in zebrafish. *J. Neurosci.* **30**, 16621-16635.
- Matsuda, T. and Cepko, C. L. (2007). Controlled expression of transgenes introduced by in vivo electroporation. *Proc. Natl. Acad. Sci. USA* **104**, 1027-1032.
- McElhinney, D. B., Geiger, E., Blinder, J., Benson, D. W. and Goldmuntz, E. (2003). NKX2.5 mutations in patients with congenital heart disease. *J. Am. Coll. Cardiol.* **42**, 1650-1655.
- Miao, M., Bruce, A. E., Bhanji, T., Davis, E. C. and Keeley, F. W. (2007). Differential expression of two tropoelastin genes in zebrafish. *Matrix Biol.* **26**, 115-124.
- Milgrom-Hoffman, M., Harrelson, Z., Ferrara, N., Zelzer, E., Evans, S. M. and Tzahor, E. (2011). The heart endocardium is derived from vascular endothelial progenitors. *Development* **138**, 4777-4787.
- Moretti, A., Caron, L., Nakano, A., Lam, J. T., Bernshausen, A., Chen, Y., Qyang, Y., Bu, L., Sasaki, M., Martin-Puig, S. et al. (2006). Multipotent embryonic Isl1+ progenitor cells lead to cardiac, smooth muscle, and endothelial cell diversification. *Cell* **127**, 1151-1165.
- Mosimann, C., Kaufman, C. K., Li, P., Pugach, E. K., Tamplin, O. J. and Zon, L. I. (2011). Ubiquitous transgene expression and Cre-based recombination driven by the ubiquitin promoter in zebrafish. *Development* **138**, 169-177.
- Nakajima, Y. (2010). Second lineage of heart forming region provides new understanding of conotruncal heart defects. *Congenit. Anom. (Kyoto)* **50**, 8-14.
- Nevis, K., Obregon, P., Walsh, C., Guner-Ataman, B., Burns, C. G. and Burns, C. E. (2013). Tbx1 is required for second heart field proliferation in zebrafish. *Dev. Dyn.* doi: 10.1002/dvdy.23928.
- Olson, E. N. (2006). Gene regulatory networks in the evolution and development of the heart. *Science* **313**, 1922-1927.
- Prall, O. W., Menon, M. K., Solloway, M. J., Watanabe, Y., Zaffran, S., Bajolle, F., Biben, C., McBride, J. J., Robertson, B. R., Chaleut, H. et al. (2007). An Nkx2-5/Bmp2/Smad1 negative feedback loop controls heart progenitor specification and proliferation. *Cell* **128**, 947-959.
- Rochais, F., Mesbah, K. and Kelly, R. G. (2009). Signaling pathways controlling second heart field development. *Circ. Res.* **104**, 933-942.
- Roger, V. L., Go, A. S., Lloyd-Jones, D. M., Benjamin, E. J., Berry, J. D., Borden, W. B., Bravata, D. M., Dai, S., Ford, E. S., Fox, C. S. et al. (2012). Heart disease and stroke statistics – 2012 update: a report from the American Heart Association. *Circulation* **125**, e2-e220.
- Schoenebeck, J. J., Keegan, B. R. and Yelon, D. (2007). Vessel and blood specification override cardiac potential in anterior mesoderm. *Dev. Cell* **13**, 254-267.
- Schott, J. J., Benson, D. W., Basson, C. T., Pease, W., Silberbach, G. M., Moak, J. P., Maron, B. J., Seidman, C. E. and Seidman, J. G. (1998). Congenital heart disease caused by mutations in the transcription factor NKX2-5. *Science* **281**, 108-111.
- Srivastava, D. and Olson, E. N. (2000). A genetic blueprint for cardiac development. *Nature* **407**, 221-226.
- Stanley, E. G., Biben, C., Elefant, A., Barnett, L., Koentgen, F., Robb, L. and Harvey, R. P. (2002). Efficient Cre-mediated deletion in cardiac progenitor cells conferred by a 3'UTR-ires-Cre allele of the homeobox gene Nkx2-5. *Int. J. Dev. Biol.* **46**, 431-439.
- Suster, M. L., Sumiyama, K. and Kawakami, K. (2009). Transposon-mediated BAC transgenesis in zebrafish and mice. *BMC Genomics* **10**, 477.
- Targoff, K. L., Schell, T. and Yelon, D. (2008). Nkx genes regulate heart tube extension and exert differential effects on ventricular and atrial cell number. *Dev. Biol.* **322**, 314-321.
- van Ham, T. J., Mapes, J., Kokel, D. and Peterson, R. T. (2010). Live imaging of apoptotic cells in zebrafish. *FASEB J.* **24**, 4336-4342.
- Verzi, M. P., McCulley, D. J., De Val, S., Dodou, E. and Black, B. L. (2005). The right ventricle, outflow tract, and ventricular septum comprise a restricted expression domain within the secondary/anterior heart field. *Dev. Biol.* **287**, 134-145.
- Vincent, S. D. and Buckingham, M. E. (2010). How to make a heart: the origin and regulation of cardiac progenitor cells. *Curr. Top. Dev. Biol.* **90**, 1-41.
- von Both, I., Silvestri, C., Erdemir, T., Lickert, H., Walls, J. R., Henkelman, R. M., Rossant, J., Harvey, R. P., Attisano, L. and Wrana, J. L. (2004). Foxh1 is essential for development of the anterior heart field. *Dev. Cell* **7**, 331-345.
- Ward, C., Stadt, H., Hutson, M. and Kirby, M. L. (2005). Ablation of the secondary heart field leads to tetralogy of Fallot and pulmonary atresia. *Dev. Biol.* **284**, 72-83.
- Westerfield, M. (2000). *The Zebrafish Book. A Guide for the Laboratory Use of Zebrafish (Danio rerio)*. Eugene, OR: University of Oregon Press.
- Witzel, H. R., Jungblut, B., Choe, C. P., Crump, J. G., Braun, T. and Dobrev, G. (2012). The LIM protein Ajuba restricts the second heart field progenitor pool by regulating Isl1 activity. *Dev. Cell* **23**, 58-70.
- Wu, S. M., Fujiwara, Y., Cibulsky, S. M., Clapham, D. E., Lien, C. L., Schultheiss, T. M. and Orkin, S. H. (2006). Developmental origin of a bipotential myocardial and smooth muscle cell precursor in the mammalian heart. *Cell* **127**, 1137-1150.
- Yelon, D., Horne, S. A. and Stainier, D. Y. (1999). Restricted expression of cardiac myosin genes reveals regulated aspects of heart tube assembly in zebrafish. *Dev. Biol.* **214**, 23-37.
- Zhou, Y., Cashman, T. J., Nevis, K. R., Obregon, P., Carney, S. A., Liu, Y., Gu, A., Mosimann, C., Sondalle, S., Peterson, R. E. et al. (2011). Latent TGF- $\beta$  binding protein 3 identifies a second heart field in zebrafish. *Nature* **474**, 645-648.
